# Supplementary material for: Remodeling of the tumor microenvironment using an engineered oncolytic vaccinia virus improves PD-L1 inhibition outcomes
Source: Oxford University Press journal article supplement (doi:10.1042/bsr20204186), 2021-06-01
Supplement: bsr-2020-4186_supp.pdf [file bsr-2020-4186_supp.pdf]

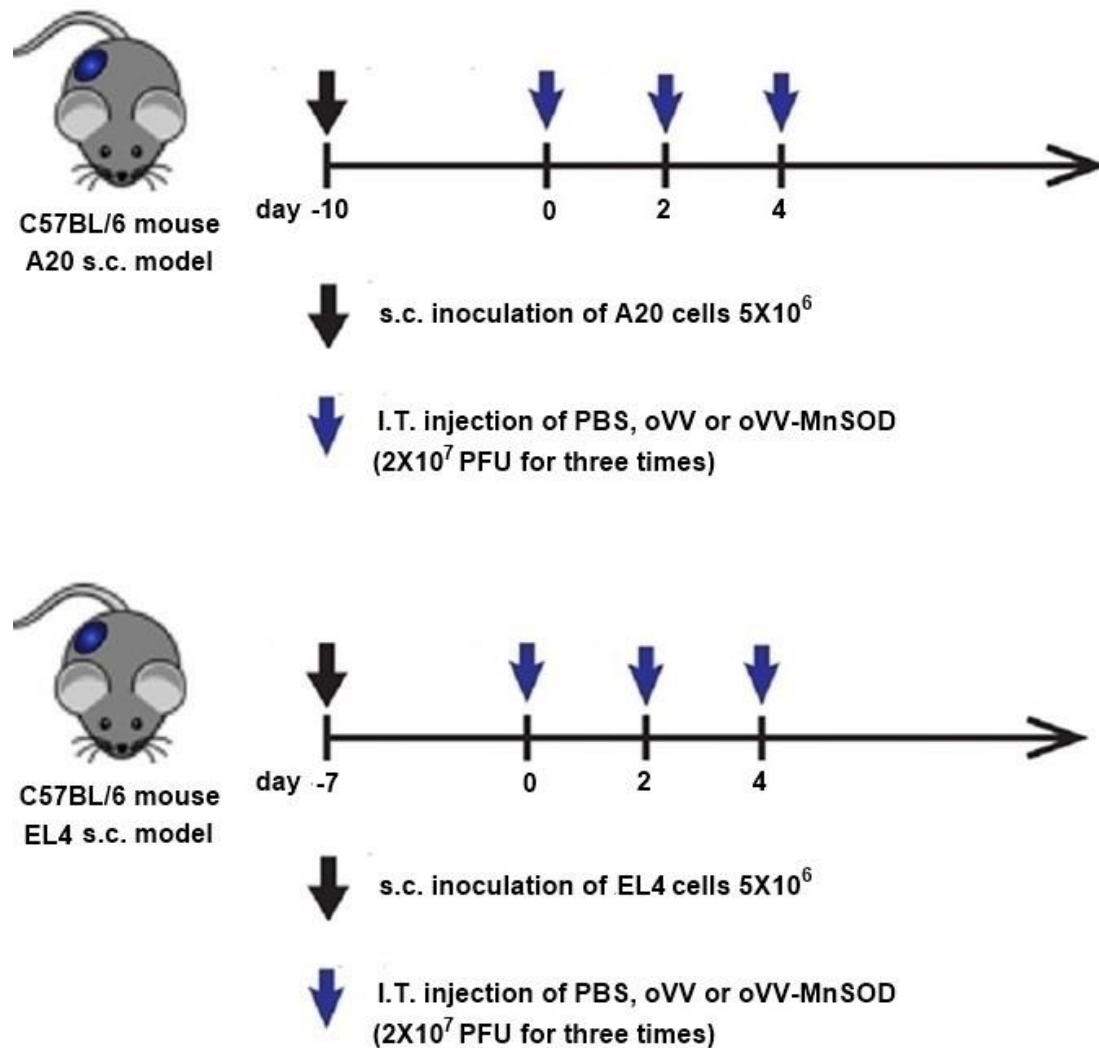

**Fig. S1. The mice treatment scheme.** The lymphoma subcutaneous (S.C.) model was established by implantation of A20 ( $5 \times 10^6$ ) EL4 ( $2 \times 10^6$ ) cells on the right flank of C57BL/6 mice. When the tumor volume reached approximately  $100 \text{ mm}^3$  (7 or 10 days post tumor inoculation), the tumor-bearing mice were treated with PBS,  $2 \times 10^7$  of oVV-Control, or oVV-MnSOD at a 2-day interval for 3 times via intratumoral (I.T.) injection.

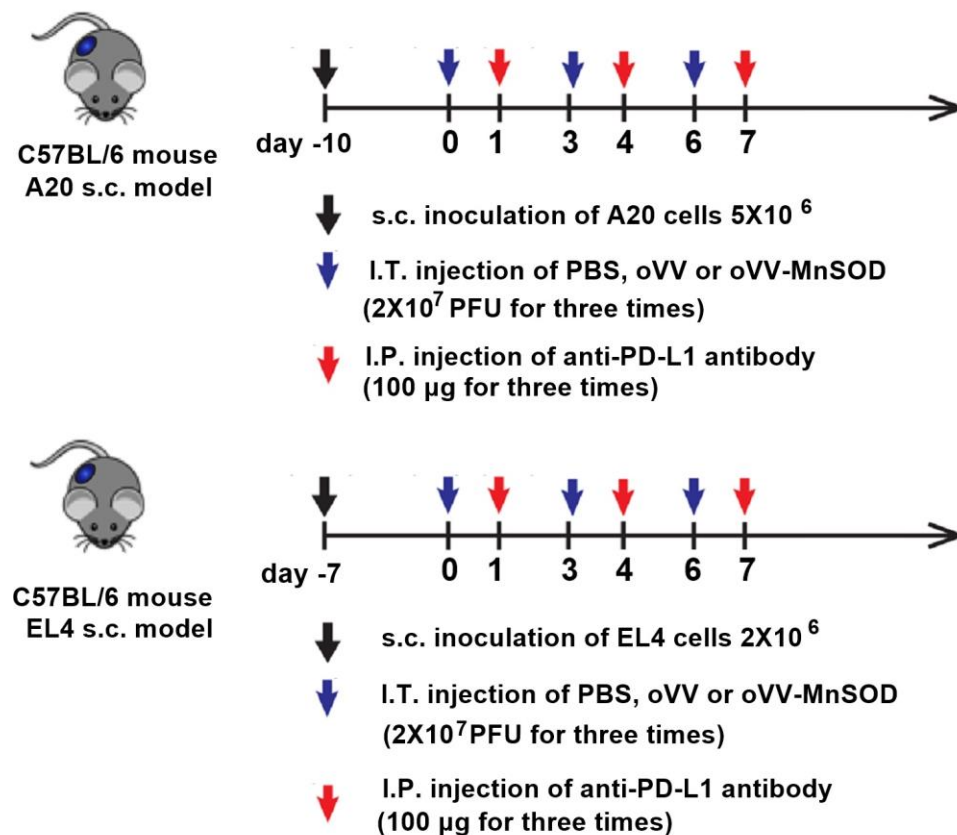

**Fig. S2. Schematic diagram of the experiment for combination therapy.** Ascites tumor model was established as previously described. The tumor-bearing mice were treated with PBS,  $2 \times 10^7$  of oVV-Control, or oVV-MnSOD at a 3-day interval for 3 times via intratumoral (I.T.) injection. And 24 hours after each OV's injection, anti-PD-L1 antibody (100  $\mu$ g per mouse) was injected intraperitoneally (I.P.) into the mouse model for total three times.
